# Supplementary material for: Impact of a multicomponent physical exercise program on intrinsic capacity in community-dwelling older adults
Source: PeerJ. 2025 Mar 12;13:e19017. doi: 10.7717/peerj.19017 (PMC11910150; doi:10.7717/peerj.19017)
Supplement: Supplemental Information 1 [file peerj-13-19017-s001.xlsx]

## Sheet: Plan1
Variable Name	Label		Level of measurement			Format		Allowed values
SOCIODEMOGRAPHIC DATA
Time	Pre-assessment or post-assessment		Nominal			1- Pre-evaluation 2- Post-evaluation		1 to 2
Code	Instrument identification		Nominal			1, 2, 3...		1 to 160
Age	Age of the elderly person		Nominal			60, 61, 62...		60 to 100
Sex	Sex of the elderly person		Nominal			1 - Female 2 - Male		1 and 2
Education	What is your education level?		Nominal			1- None		1 to 8
						2- Incomplete elementary education/Incomplete primary education
						3- Completed elementary education/completed primary education
						4- Incomplete high school/incomplete high school/incomplete technical course/teaching course.
						5- Completed high school/completed high school/technical course/teaching
						6- Incomplete higher education
						7- Completed higher education
						8- Completed higher education postgraduate
Marital status	What is your marital status?		Nominal			1- Married/with partner		1 to 4
						2- Separated/Divorced
						3- Widower
						4- Single
Current occupation	Current occupational situation of the elderly person		Nominal			1- Employee		1 to 8
						2- Self-employed
						3- Unemployed (last job less than 1 year ago)
						4- Retired
						5- Does not work, but receives benefits
						6- Does not work and does not receive benefits
						7- Domestic activities (housewife)
						8- Retirement and other source (rent)
						9- Never worked
Source of income	Which of these sources of income do you have?		Nominal			1- Pension		1 to 6
						2- Salary
						3- Third party help
						4- Retirement
						5- No income
						6- Others
	FAMILY AND SOCIAL STRUCTURE
Children	No. of children		Climb			0,1,2,3		1 to 15
Family Arrangement	Who do you live with?		Nominal			1- Alone		1 to 5
						2- With spouse
						3- With children/grandchildren
						4- With spouse, children and grandchildren
						5- Others
Support network	Do you have people you can count on?		Nominal			1- Yes		1 and 2
						2- No
Social Participation	Do you attend any community or community center?		Nominal			1- Yes		1 and 2
						2- No
Leisure	Do you do any leisure activities?		Nominal			1- Yes		1 and 2
						2- No
At. Reasoning	In the last 12 months, have you performed reasoning activities?		Nominal			1- Yes		1 and 2
						2- No
At. Playful	In the last 12 months, have you carried out recreational activities?		Nominal			1- Yes		1 and 2
						2- No
	HEALTH DATA
Health perception	Self-perception of health		Nominal			1- Terrible		1 to 4
						2- Bad
						3- More or less
						4- Good
						5- Great
Illness	Do you currently have any health problems?		Nominal			1- Yes		1 and 2
						2- No
Disease 1	Have you been diagnosed with a mood disorder (depression, bipolar)?		Nominal			1- Yes		1 and 2
						2- No
Disease 2	Have you been diagnosed with an anxiety disorder (phobia, panic)?		Nominal			1- Yes		1 and 2
						2- No
Disease 3	Have you been diagnosed with Schizophrenia?		Nominal			1- Yes		1 and 2
						2- No
Disease 4	Have you been diagnosed with stroke (ischemia)?		Nominal			1- Yes		1 and 2
						2- No
Disease 5	Have you been diagnosed with epilepsy?		Nominal			1- Yes		1 and 2
						2- No
Disease 6	Have you been diagnosed with Multiple Sclerosis?		Nominal			1- Yes		1 and 2
						2- No
Disease 7	Have you been diagnosed with Parkinson's?		Nominal			1- Yes		1 and 2
						2- No
Disease 8	You have been diagnosed with Alzheimer's		Nominal			1- Yes		1 and 2
						2- No
Disease 9	You have been diagnosed with dyslipidemia		Nominal			1- Yes		1 and 2
						2- No
Disease 10	Have you been diagnosed with angina?		Nominal			1- Yes		1 and 2
						2- No
Disease 11	Have you been diagnosed with hypertension?		Nominal			1- Yes		1 and 2
						2- No
Disease 12	Have you been diagnosed with a heart attack?		Nominal			1- Yes		1 and 2
						2- No
Disease 13	Have you been diagnosed with diabetes?		Nominal			1- Yes		1 and 2
						2- No
Disease 14	Have you been diagnosed with osteoporosis?		Nominal			1- Yes		1 and 2
						2- No
Disease 15	Have you been diagnosed with hyperthyroidism?		Nominal			1- Yes		1 and 2
						2- No
Disease 16	Have you been diagnosed with hypothyroidism?		Nominal			1- Yes		1 and 2
						2- No
Disease 17	Have you been diagnosed with another illness?		Nominal			1- Yes		1 and 2
						2- No
Medications	Do you use any continuous medication?		Nominal			1- Yes		1 and 2
						2- No
Polypharmacy	How many medications do you use continuously?		Climb			0,1,2,3,4		1 to 20
Medications 1	Do you use antihypertensive medication?		Nominal			1- Yes		1 and 2
						2- No
Medications 2	Do you use anti-diabetic medication?		Nominal			1- Yes		1 and 2
						2- No
Medications 3	Do you use psychotropic medication?		Nominal			1- Yes		1 and 2
						2- No
Medications 4	Do you use anti-inflammatory medication?		Nominal			1- Yes		1 and 2
						2- No
Medications 5	Do you use antacid medications?		Nominal			1- Yes		1 and 2
						2- No
Medications 6	Do you use anti-lipemic medications?		Nominal			1- Yes		1 and 2
						2- No
Medications 7	Do you use anti-arrhythmic medication?		Nominal			1- Yes		1 and 2
						2- No
Medications 8	Do you use mineral supplements?		Nominal			1- Yes		1 and 2
						2- No
Medications 9	Do you use vitamin supplements?		Nominal			1- Yes		1 and 2
						2- No
Medications 10	Do you take medication for arthritis/arthrosis/osteoporosis?		Nominal			1- Yes		1 and 2
						2- No
Medications 11	Do you use anti-Alzheimer's medication?		Nominal			1- Yes		1 and 2
						2- No
Medications 12	Do you use hormone replacement therapy?		Nominal			1- Yes		1 and 2
						2- No
Medications 13	Do you use painkillers?		Nominal			1- Yes		1 and 2
						2- No
Medications 14	Do you use other medications?		Nominal			1- Yes		1 and 2
						2- No
Falls	Have you had any falls in the last 12 months?		Nominal			1- Yes		1 and 2
						2- No
Falls_N	How many times have you fallen in the last 12 months?		Climb			0,1,2,3,4		1 to 10
Glasses	Do you wear prescription glasses?		Nominal			1- Yes		1 and 2
						2- No
Vision	Do you have any eye problems? Difficulty seeing far away, difficulty reading, eye disease, or are you currently undergoing medical treatment (e.g. for diabetes or high blood pressure)?		Nominal			1- Yes		1 and 2
						2- No
Scoreview	Vision score according to intrinsic ability		Nominal			0 - those who have difficulty seeing things from far away or up close and wear prescription glasses		0 to 1
						1- those who have no difficulty seeing things from far away or up close and do not wear prescription glasses.
Hearing aid	Do you use a hearing aid?		Nominal			1- Yes		1 and 2
						2- No
Hearing	Do you have any difficulty hearing whispers?		Nominal			1- Yes		1 and 2
						2- No
Scorelistening	Listening score according to intrinsic ability		Nominal			0 - those who have difficulty hearing whispers and do not use hearing aids		0 to 1
						1 - those who have no difficulty hearing whispers and do not use hearing aids.
DS Score	Score obtained in the sensory domain		Climb			0,1,2		0 to 2
VariationDS	Variation in post-test sensory domain		Climb			-1,0,1,2		-1,0,1,2
Alcoholism	Do you drink alcohol at least once a week?		Nominal			1- Yes		1 and 2
						2- No
Smoking	Do you smoke cigarettes?		Nominal			1- Yes		1 and 2
						2- No
Physical Exercise	Have you exercised in the last 3 months?		Nominal			1- Yes		1 and 2
						2- No
Physical Exercise_times	How many times a week have you exercised in the last 3 months?		Climb			1,2,3,4		1 to 7
Sleep	Do you have insomnia?		Nominal			1- Yes		1 and 2
						2- No
Sleep 1	Do you have a restful sleep?		Nominal			1- Yes		1 and 2
						2- No
Sleep 2	How many hours do you sleep on average per day?		Climb			1,2,3,4		1 to 12
Sun	Do you often expose yourself to the sun?		Nominal			1- Yes		1 and 2
						2- No
Sun_times	How many times a week do you usually expose yourself to the sun?		Climb			0,1,2,3,4		1 to 7
SCALES
EDG1	Are you basically satisfied with your life?		Nominal			0 - Yes		0 and 1
						1- No
EDG2	Have you given up many of your interests and activities?		Nominal			1- Yes		0 and 1
						0- No
EDG3	Do you feel that your life is empty?		Nominal			1- Yes		0 and 1
						0 - No
EDG4	Do you often get bored?		Nominal			1- Yes		0 and 1
						0- No
EDG5	Do you feel in a good mood most of the time?		Nominal			0 - Yes		0 and 1
						1- No
EDG6	Are you afraid that something bad will happen to you?		Nominal			1- Yes		0 and 1
						0- No
EDG7	Do you feel happy most of the time?		Nominal			0- Yes		0 and 1
						1- No
EDG8	Do you feel that there is no way out of your situation?		Nominal			1- Yes		0 and 1
						0 - No
EDG9	Do you prefer to stay at home rather than go out and do new things?		Nominal			1- Yes		0 and 1
						0- No
EDG10	Do you feel like you have more memory problems than most?		Nominal			1- Yes		0 and 1
						0- No
EDG11	Do you think it's wonderful to be alive?		Nominal			0- Yes		0 and 1
						1- No
EDG12	Do you feel useless in the current circumstances?		Nominal			1- Yes		0 and 1
						0- No
EDG13	Do you feel full of energy?		Nominal			0- Yes		0 and 1
						1- No
EDG14	Do you think your situation is hopeless?		Nominal			1- Yes		0 and 1
						0- No
EDG15	Do you feel that most people are better off than you?		Nominal			1- Yes		0 and 1
						0 - No
Score_EDG15	Score obtained on the EDG scale 15		Climb			1,2,3,4		0 to 15
ScoreVariationEDG15	Variation in the EDG15 scale score in the post-test		Climb			0,1,2,3		0 to 2
Classification_EDG15	EDG15 scale rating		Ordinal			1 - Normal (0 to 5)		1 to 3
						2 - Mild depression (6 to 10)
						3- Severe Depression (11 to 15)
DP Score	Score obtained in the psychological domain according to intrinsic capacity		Nominal			0 - values between 11 and 15		0 to 2
						1- values between 6 and 10
						2- values between 0 and 5.
VariationScoreDP	Variation in psychological domain scores in the post-test		Climb			0,1,2,3		-1,0,1,2
IPAQ_total	Total number of minutes in IPAQ		Climb			1,2,3,4		1 to 2000
IPAQ Variation	Post-test IPAQ variation		Climb			0,1,2,3...		1 to 1000
IPAQ_classification	Classification of physical activity level according to IPAQ.		Ordinal			1- Sedentary		1 to 4
						2- Insufficiently active
						3- Active
						4- Very active
SedentaryBehavior_total	Total number of minutes spent in sedentary behavior.		Climb			1,2,3,4		1 to 2000
SedentaryBehavior_classification	Classification of the level of sedentary behavior according to the number of minutes.		Ordinal			1 - Low (< 480 min/day)		1 to 2
						2 - High (> 480 min/day)
SF-6D1	Regarding yourfunctional capacity, Do you think that...?		Nominal			1- Your health does not make it difficult for you to do vigorous activities.		1 to 6
						2. Your health makes it a little difficult for you to do vigorous activities.
						3. Your health makes it a little difficult for you to do moderate activities.
						4. Your health makes it very difficult for you to do moderate activities.
						5. Your health makes it a little difficult for you to bathe or get dressed.
						6. Your health makes it very difficult for you to bathe or get dressed.
SF-6D2	In relation toglobal limitation Do you think that...?		Nominal			1 - You have not had problems with your work or any other regular daily activity as a result of your physical health or any emotional problem.		1 to 4
						2- You have been limited in your type of work or other activities as a result of your physical health.
						3 - You have accomplished fewer tasks than you would like as a result of some emotional problem.
						4 - You have been limited in your type of work or other activities as a result of your physical health and have accomplished fewer tasks than you would like as a result of some emotional problem.
SF-6D3	Regarding social aspects, do you think that...?		Nominal			1- Your physical health or emotional problemsdid not interfere in their social activitiesat no time.		1 to 5
						2-Your physical health or emotional problems interfered in their social activitiesin a small part of the time.
						3- Your physical health or emotional problems interfered in their social activitiesat some point in time
						- Your physical health or emotional problemsinterfered in their social activities most of the time.
						5 - Your physical health or emotional problems interfered with your social activitiesall the time.
SF-6D4	Regarding pain, do you think that...?		Nominal			1 - You didn't have any pain in your body.		1 to 6
						2 - Youhad pain ,but the paindid not interfere in any way in their normal work (including both work outside the home and inside the home).
						3 - You had pain that interfered somewhat with your normal work (including both work outside the home and work inside the home).
						4- Youhad pain that interfered moderately in your normal work (including both work outside the home and inside the home).
						5 - Youthere was pain that interfered a lot in your normal work (including both work outside the home and inside the home).
						- You had pain that greatly interfered with your normal work (including both work outside the home and work inside the home).
SF-6D5	In relation tomental health (Sir/Madam) do you think that...?		Nominal			1- Youhas never felt a very nervous or discouraged and dejected person.		1 to 5
						2 -You has been feeling a very nervous or discouraged and dejected persona small part of the time.
						3 - Have you been feeling very nervous or discouraged and down in the dumps?some of the time.
						4- You have been feeling very nervous or discouraged and dejectedmost of the time.
						5- You have been feeling very nervous or discouraged and dejectedall the time.
SF-6D6	In relation tovitality (Sir/Madam) do you think that...?		Nominal			1- You have been feeling very energeticall the time.		1 to 5
						2 - Have you been feeling very energetic?most of the time.
						3- You have been feeling very energeticat some point in time.
						4 - Have you been feeling very energetic?a small part of the time.
						5 -Younever have been feeling very energetic.
CPF1	Indicate your ability to take care of yourself (e.g. dressing yourself)		Nominal			0 - Can't		1 to 2
						1- Can do it with difficulty or with help
						2- Can you
CPF2	Indicate your ability to take a bath (bathtub or shower)		Nominal			0 - Can't		1 to 2
						1- Can do it with difficulty or with help
						2- Can you
CPF3	Indicate your ability to walk one or two blocks		Nominal			0 - Can't		1 to 2
						1- Can do it with difficulty or with help
						2- Can you
CPF4	Indicate your ability to perform light household tasks (cooking, dusting, washing dishes, sweeping).		Nominal			0 - Can't		1 to 2
						1- Can do it with difficulty or with help
						2- Can you
CPF5	Indicate your ability to climb and descend a flight of stairs		Nominal			0 - Can't		1 to 2
						1- Can do it with difficulty or with help
						2- Can you
CPF6	Indicate your ability to shop (supermarket, clothing)		Nominal			0 - Can't		1 to 2
						1- Can do it with difficulty or with help
						2- Can you
CPF7	Indicate your ability to walk approximately 800 meters (6 to 7 blocks)		Nominal			0 - Can't		1 to 2
						1- Can do it with difficulty or with help
						2- Can you
CPF8	Indicate your ability to walk approximately 1600 meters (12 to 14 blocks)		Nominal			0 - Can't		1 to 2
						1- Can do it with difficulty or with help
						2- Can you
CPF9	Indicate your capacity to hold and carry approximately 5kg (supermarket bag)		Nominal			0 - Can't		1 to 2
						1- Can do it with difficulty or with help
						2- Can you
CPF10	Indicate your capacity to hold and carry approximately 12kg (medium to large suitcase)		Nominal			0 - Can't		1 to 2
						1- Can do it with difficulty or with help
						2- Can you
CPF11	Indicate your ability to perform heavy household tasks (sweeping, vacuuming the floor, mopping the floor, gardening)		Nominal			0 - Can't		1 to 2
						1- Can do it with difficulty or with help
						2- Can you
CPF12	Indicate your ability to perform strenuous activities (taking long walks, carrying heavy objects, digging, cycling, doing gymnastics)		Nominal			0 - Can't		1 to 2
						1- Can do it with difficulty or with help
						2- Can you
CPF Score	Score obtained on the CPF scale		Climb			1,2,3,4		0 to 24
VariationScoreCPF	Variation in CPF scale score in the post-test		Climb			0,1,2,3		0 to 5
ClassificationCPF	Classification obtained on the CPF scale		Ordinal			1 - Low functionality (< 14 points)		1 to 3
						2- Moderate functionality (14 to 23 points)
						3- High functionality (> 24 points)
ScoreMoca	Score obtained in the MoCA test		Climb			0,1,2,3,4		1 to 30
ScoreVariationMoca	Variation in the Moca scale in the post-test		Climb			0,1,2,3,4		1 to 5
MoCA Classification	Classification obtained in the MoCA test according to schooling (CC < 20 points for 4 to 12 years and < 21 points for + 12 years)		Nominal			1- No cognitive impairment		1 to 2
						2- With cognitive impairment
DCScore	Moca scoring according to intrinsic ability		Climb			0- cognitive impairment		0 to 2
						2- no cognitive impairment
VariationScoreDC	Variation in DC in post-test		Climb			0,1,2,3		0 to 5
PHYSICAL EVALUATION
Weight	Weight (kg)		Climb			1,2,3,4		1 to 100
Weight Variation	Weight variation in post-test		Climb			1,2,3,4
Height	Height (cm)		Climb			1,2,3,4		1 to 200
Current fat	Current Body Fat Percentage (%)		Climb			1,2,3,4...		1 to 50
CurrentFatVariation	Variation in current fat value in post-test		Climb			1,2,3,4...		1 to 10
Class_Current Fat	Current Body Fat Percentage Ranking (%)		Ordinal			1- Low (< 24 M; < 13 H)		1 to 4
						2- Normal (24.0 -35.9 M; 13.0 - 24.9 H)
						3- High (36.0 - 41.9 M; 25.0 - 29.9 H)
						4- Very high (≥ 42.0 M; ≥ 30 H)
Muscle mass	Muscle mass percentage (%)		Climb			1,2,3,4...		1 to 50
MuscleMassVariation	Variation in muscle mass in the post-test		Climb			1,2,3,4		1 to 5
visceral fat	Value of visceral fat		Climb			1,2,3,4		1 to 15
VariationVisceral_fat	Variation in visceral fat in the post-test		Climb			1,2,3,4		1 to 5
Class_Visceral fat	Visceral Fat Classification		Ordinal			1- Normal (≤ 9)		1 to 3
						2- High (≥ 10 and ≤ 14)
						3- Very High (≥ 15)
Basal metabolic value	Basal metabolic value in k/cal		Climb			1,2,3,4		1 to 3000
Body age	Body age in years		Climb			1,2,3,4		1 to 100
BMI	BMI (weight/height2)		Climb			1,2,3,4		1 to 40
IMC Score	BMI score according to intrinsic capacity		Nominal			1- values between 22- 27 Kg/m2
						0.5- values below 22 kg/m2 and above 27 kg/m2
BMI Variation	Post-test BMI variation		Climb			0,1,2,3		1 to 5
Nutritional Status	Classification of the nutritional status of the elderly		Ordinal			1 - Low weight (less than 22 kg/m2)		1 to 3
						2- Adequate weight (above 22 and less than or equal to 27 kg/m2)
						3- Overweight (over 27 kg/m2)
Grip strength D	Right hand grip strength in kgf		Climb			1,2,3,4		1 to 50
FPD Score	FPD score according to intrinsic ability		Nominal			0- strength values lower than < 27 kgf for men and < 16 kgf for women
						0.5 - values equal to or greater than ≥ 27 kgf for men and ≥16 kgf for women
FPD Classification	Do you have low muscle strength?		Nominal			1- Yes (< 16 kg M; < 27 kg H)		1 to 2
						2- No
weight_loss	Have you had an unintentional weight loss of 3 kg or more in the last three months?		Nominal			1- Yes 2- No		1 to 2
weight_loss1	How many kilograms were lost?		Climb			0,1,2,3,4		0 to 100
WeightLossScore	Weight loss score according to intrinsic capacity		Nominal			0- for weight loss of 3kg or more in the last three months
						0.5- for losses of less than 3kg or no weight loss
Loss_of_appetite	Have you been experiencing loss of appetite?		Nominal			1- Yes 2-No		1 to 2
ScoreLossofappetite	Appetite loss score according to intrinsic capacity		Nominal			0 - for “yes” answers
						0.5 for the answer “no”
DV Score	Score obtained in the vitality domain		Climb			0,1,2,3,4		1 to 4
Sit and Stand	Number of repetitions in 30 seconds		Climb			1,2,3,4		1 to 30
VariationSittingandStanding	Variation in the sit-to-stand test at post-test		Climb			0,1,2,3		1 to 5
Class_sit and stand	Sit-to-stand test classification		Ordinal		Woman	1- Normal 2- Risk	(60- 64): 15	1 to 2
							(65 to 69): 15
							(70 to 74): 14
							(75 to 79): 13
							(80 to 84): 12
							(85 to 89): 11
							(90 to 94): 9
					Man	1- Normal 2- Risk	(60 to 64): 17
							(65 to 69): 16
							(70 to 74): 15
							(75 to 79): 14
							(80 to 84): 13
							(85 to 89): 11
							(90 to 94): 9
ScoreSittingandStanding	Sit-to-stand test scoring according to intrinsic capacity		Nominal			1- cut-off point reached for sex and age
						0-cutoff point not reached for sex and age
TUG	Time to perform TUG in seconds		Climb			1,2,3,4		1 to 30
TUG Variation	Variation in TUG in post-test		Climb			1,2,3,4		1 to 5
Class_TUG	TUG classification according to time in seconds		Ordinal			1 - Normal (< 10 seconds)		1 to 3
						2- Moderate risk of falls (≥10 and <19 seconds)
						3- High risk of falls (> 20 seconds)
TUgScore	TUG test score according to intrinsic capacity		Nominal			1- time less than 10 seconds
						0- time greater than 10 seconds
Flexibility	Value in the Chair Sit & Reach test in centimeters		Climb			1,2,3,4		1 to 20
ScoreFlexibility	Flexibility test score according to intrinsic capacity		Nominal			0.0 - for low flexibility
						0.5 for normal flexibility
VariationFlexibility	Variation in flexibility testing in the post-test		Climb			-1,0,1,2,3		1 to 2
Class_Flexibility	Flexibility test classification		Ordinal		Woman	1- Normal flexibility	(60-64): -0.5 to +5.0
							(65-69): -0.5 to +4.5
							(70-74): -1.0 to +4.0
						2- Low flexibility	(75 to 79): -1.5 to +3.5
							(80 to 84): -2.0 to +3.0
							(85 to 89): -2.5 to +2.5
							(90 to 94): -4.5 to +1.0
					Man	1- Normal flexibility	(60 to 64): -2.5 to +4.0
							(65 to 69): -3.0 to +3.0
							(70 to 74): -3.5 to +2.5
							(75 to 79): -4.9 to +2.0
						2- Low flexibility	(80 to 84): -5.5 to +1.5
							(85 to 89): -5.5 to +0.5
							(90 to 94): -6.5 to -0.5
Balance	Bohannon test value in seconds		Climb			1,2,3,4		1 to 20
ScoreBalance	Balance test score according to intrinsic capacity		Nominal			0.0 - for < 20 seconds
						0.5 - for > 21 seconds
VariationBalance	Variation in balance test in post-test		Climb			1,2,3,4		1 to 4
Class_Bohannon	Classification in the Bohannon test according to time in seconds		Ordinal			1- Risk (< 20 seconds men and women)		1 to 3
						2- Normal (> 21 seconds men and women)
						3- Excellent (31 seconds men and women)
DL Score	Score obtained in the locomotor domain		Climb			0,1,2		1 to 2
Pwaist	Waist circumference in centimeters		Climb			1,2,3,4		1 to 200
VariationWaist	Variation in waist circumference in the post-test		Climb			0,1,2,3,4		1 to 5
Abdominal	Abdominal perimeter in centimeters		Climb			1,2,3,4		1 to 200
Abdominal Variation	Variation in abdominal perimeter in the post-test		Climb			0,1,2,3		1 to 5
Class_Pabdominal	Abdominal perimeter classification		Ordinal			1- Normal (< 79cm M; < 83cm H)		1 to 3
						2 - High (> 80 cm M; > 84 cm H)
						3 - Very High (≥ 88 cm M; ≥ 102 cm H)
PcoxaD	Thigh circumference D in centimeters		Climb			1,2,3,4		1 to 100
VariationPcoxaD	Variation in the perimeter of the thigh D in the post-test		Climb			0,1,2,3		1 to 5
PcoxaE	Thigh circumference E in centimeters		Climb			1,2,3,4		1 to 100
VariationPcoxaE	Variation in left thigh perimeter in the post-test		Climb			1,2,3,4,5		1 to 5
PcalfD	Calf circumference D in centimeters		Climb			1,2,3,4		1 to 100
Calf VariationD	Variation in the perimeter of the right calf in the post-test		Climb			0,1,2,3,4
Calf	Calf circumference E in centimeters		Climb			1,2,3,4		1 to 100
Calf Variation And	Variation in calf perimeter E in the post-test		Climb			0,1,2,3,4		1 to 5
Class_Calf	Classification of Calf Circumference in Centimeters		Ordinal			1- Normal (> 31 cm H and M)		1 and 2
						2- Decreased (< 31 cm H and M)
PAS	Systolic Blood Pressure Value in Millimeters of Mercury (mmHg)		Climb			1,2,3,4		1 to 200
PAD	Diastolic Blood Pressure Value in Millimeters of Mercury (mmHg)		Climb			1,2,3,4		1 to 200
Class_PA	Blood Pressure Classification		Ordinal			1 - Optimal BP (SBP < 120 and DBP < 80)		1 to 6
						- Normal BP (SBP: 120-129 and/or DBP: 80-84)
						3- Pre-Hypertension (SBP: 130-139 and/or DBP: 85-89)
						4- HA stage I (SBP: 140-159 and/or DBP: 90-99)
						5- HA stage II (SBP: 160-179 and/or DBP: 100-109)
						6- HA stage III (SBP: ≥ 180 and DBP: ≥ 110)
Heart Rate	Heart rate measurement value in beats per minute		Climb			1,2,3,4		1 to 200
Heart_Rate_Variation	Heart rate variation in post-test		Climb			-1,0,1,2		1 to 30
CIC Score	Composite intrinsic ability score		Climb			0,1,2,3		1 to 10
CIC Variation	Variation in composite intrinsic capacity in the post-test		Climb			0,1,2,3		1 to 10
FrequencyP	Number of times you attend the PIAFI program per week		Ordinal			1- 1x per week		1 to 5
						2- 2x per week
						3- 3x per week
						4- 4x per week
						5- 5x per week
TimeP	Time spent in PIAFI performing activities (in minutes)		Climb			1,2,3,4		1 to 400
Bodybuilding and Cardio	Have you practiced weight training and cardio in the last 3 months?		Nominal			1- Yes		1 to 2
						2- No
Chinese Healing Gymnastics	Have you practiced Chinese healing gymnastics in the last 3 months?		Nominal			1- Yes		1 to 2
						2- No
Pilates	Have you practiced Pilates in the last 3 months?		Nominal			1- Yes		1 to 2
						2- No
Circular dances	Have you practiced Circular Dances in the last 3 months?		Nominal			1- Yes		1 to 2
						2- No
Gerontomotricity	Have you practiced gerontomotricity in the last 3 months?		Nominal			1- Yes		1 to 2
						2- No
Maintenance gymnastics	Have you practiced any type of maintenance gymnastics in the last 3 months?		Nominal			1- Yes		1 to 2
						2- No
Pedestrianism	Have you practiced hiking in the last 3 months?		Nominal			1- Yes		1 to 2
						2- No
Nordic walking	Have you practiced Nordic walking in the last 3 months?		Nominal			1- Yes		1 to 2
						2- No
Water aerobics/Water activity	Have you practiced water aerobics/aquatic activities in the last 3 months?		Nominal			1- Yes		1 to 2
						2- No
Exchange	Have you used the exchange method in the last 3 months?		Nominal			1- Yes		1 to 2
						2-No
N_modalities	How many sports do you practice at PIAFI?		Climb			1,2,3,4,5		1 to 10
