# Supplementary material for: Impact of a multicomponent physical exercise program on intrinsic capacity in community-dwelling older adults
Source: PeerJ. 2025 Mar 12;13:e19017. doi: 10.7717/peerj.19017 (PMC11910150; doi:10.7717/peerj.19017)
Supplement: Supplemental Information 2 [file peerj-13-19017-s002.xlsx]

## Sheet:  Spreadsheet1
Variable Name	Label		Level of measurement			Format		Allowed values
SOCIODEMOGRAPHIC DATA
Time	Pre-assessment or post-assessment		Nominal			1- Pre-evaluation 2- Post-evaluation		1 to 2
Code	Instrument identification		Nominal			1, 2, 3...		1 to 160
Age	Age of the elderly person		Nominal			60, 61, 62...		60 to 100
Sex	Sex of the elderly person		Nominal			1 - Female 2 - Male		1 and 2
Education	What is your education level?		Nominal			1- None		1 to 8
						2- Incomplete elementary education/Incomplete primary education
						3- Completed elementary education/completed primary education
						4- Incomplete high school/incomplete high school/incomplete technical course/teaching course.
						5- Completed high school/completed high school/technical course/teaching
						6- Incomplete higher education
						7- Completed higher education
						8- Completed higher education postgraduate
Marital status	What is your marital status?		Nominal			1- Married/with partner		1 to 4
						2- Separated/Divorced
						3- Widower
						4- Single
Current occupation	Current occupational situation of the elderly person		Nominal			1- Employee		1 to 8
						2- Self-employed
						3- Unemployed (last job less than 1 year ago)
						4- Retired
						5- Does not work, but receives benefits
						6- Does not work and does not receive benefits
						7- Domestic activities (housewife)
						8- Retirement and other source (rent)
						9- Never worked
Source of income	Which of these sources of income do you have?		Nominal			1- Pension		1 to 6
						2- Salary
						3- Third party help
						4- Retirement
						5- No income
						6- Others
	FAMILY AND SOCIAL STRUCTURE
Children	No. of children		Climb			0,1,2,3		1 to 15
Family Arrangement	Who do you live with?		Nominal			1- Alone		1 to 5
						2- With spouse
						3- With children/grandchildren
						4- With spouse, children and grandchildren
						5- Others
Support network	Do you have people you can count on?		Nominal			1- Yes		1 and 2
						2- No
Social Participation	Do you attend any community or community center?		Nominal			1- Yes		1 and 2
						2- No
Leisure	Do you do any leisure activities?		Nominal			1- Yes		1 and 2
						2- No
At. Reasoning	In the last 12 months, have you performed reasoning activities?		Nominal			1- Yes		1 and 2
						2- No
At. Playful	In the last 12 months, have you carried out recreational activities?		Nominal			1- Yes		1 and 2
						2- No
	HEALTH DATA
Health perception	Self-perception of health		Nominal			1- Terrible		1 to 4
						2- Bad
						3- More or less
						4- Good
						5- Great
Illness	Do you currently have any health problems?		Nominal			1- Yes		1 and 2
						2- No
Disease 1	Have you been diagnosed with a mood disorder (depression, bipolar)?		Nominal			1- Yes		1 and 2
						2- No
Disease 2	Have you been diagnosed with an anxiety disorder (phobia, panic)?		Nominal			1- Yes		1 and 2
						2- No
Disease 3	Have you been diagnosed with Schizophrenia?		Nominal			1- Yes		1 and 2
						2- No
Disease 4	Have you been diagnosed with stroke (ischemia)?		Nominal			1- Yes		1 and 2
						2- No
Disease 5	Have you been diagnosed with epilepsy?		Nominal			1- Yes		1 and 2
						2- No
Disease 6	Have you been diagnosed with Multiple Sclerosis?		Nominal			1- Yes		1 and 2
						2- No
Disease 7	Have you been diagnosed with Parkinson's?		Nominal			1- Yes		1 and 2
						2- No
Disease 8	You have been diagnosed with Alzheimer's		Nominal			1- Yes		1 and 2
						2- No
Disease 9	You have been diagnosed with dyslipidemia		Nominal			1- Yes		1 and 2
						2- No
Disease 10	Have you been diagnosed with angina?		Nominal			1- Yes		1 and 2
						2- No
Disease 11	Have you been diagnosed with hypertension?		Nominal			1- Yes		1 and 2
						2- No
Disease 12	Have you been diagnosed with a heart attack?		Nominal			1- Yes		1 and 2
						2- No
Disease 13	Have you been diagnosed with diabetes?		Nominal			1- Yes		1 and 2
						2- No
Disease 14	Have you been diagnosed with osteoporosis?		Nominal			1- Yes		1 and 2
						2- No
Disease 15	Have you been diagnosed with hyperthyroidism?		Nominal			1- Yes		1 and 2
						2- No
Disease 16	Have you been diagnosed with hypothyroidism?		Nominal			1- Yes		1 and 2
						2- No
Disease 17	Have you been diagnosed with another illness?		Nominal			1- Yes		1 and 2
						2- No
Medications	Do you use any continuous medication?		Nominal			1- Yes		1 and 2
						2- No
Polypharmacy	How many medications do you use continuously?		Climb			0,1,2,3,4		1 to 20
Medications 1	Do you use antihypertensive medication?		Nominal			1- Yes		1 and 2
						2- No
Medications 2	Do you use anti-diabetic medication?		Nominal			1- Yes		1 and 2
						2- No
Medications 3	Do you use psychotropic medication?		Nominal			1- Yes		1 and 2
						2- No
Medications 4	Do you use anti-inflammatory medication?		Nominal			1- Yes		1 and 2
						2- No
Medications 5	Do you use antacid medications?		Nominal			1- Yes		1 and 2
						2- No
Medications 6	Do you use anti-lipemic medications?		Nominal			1- Yes		1 and 2
						2- No
Medications 7	Do you use anti-arrhythmic medication?		Nominal			1- Yes		1 and 2
						2- No
Medications 8	Do you use mineral supplements?		Nominal			1- Yes		1 and 2
						2- No
Medications 9	Do you use vitamin supplements?		Nominal			1- Yes		1 and 2
						2- No
Medications 10	Do you take medication for arthritis/arthrosis/osteoporosis?		Nominal			1- Yes		1 and 2
						2- No
Medications 11	Do you use anti-Alzheimer's medication?		Nominal			1- Yes		1 and 2
						2- No
Medications 12	Do you use hormone replacement therapy?		Nominal			1- Yes		1 and 2
						2- No
Medications 13	Do you use painkillers?		Nominal			1- Yes		1 and 2
						2- No
Medications 14	Do you use other medications?		Nominal			1- Yes		1 and 2
						2- No
Falls	Have you had any falls in the last 12 months?		Nominal			1- Yes		1 and 2
						2- No
Falls_N	How many times have you fallen in the last 12 months?		Climb			0,1,2,3,4		1 to 10
Glasses	Do you wear prescription glasses?		Nominal			1- Yes		1 and 2
						2- No
Vision	Do you have any eye problems? Difficulty seeing far away, difficulty reading, eye disease, or are you currently undergoing medical treatment (e.g. for diabetes or high blood pressure)?		Nominal			1- Yes		1 and 2
						2- No
Scoreview	Vision score according to intrinsic ability		Nominal			0 - those who have difficulty seeing things from far away or up close and wear prescription glasses		0 to 1
						1- those who have no difficulty seeing things from far away or up close and do not wear prescription glasses.
Hearing aid	Do you use a hearing aid?		Nominal			1- Yes		1 and 2
						2- No
Hearing	Do you have any difficulty hearing whispers?		Nominal			1- Yes		1 and 2
						2- No
Scorelistening	Listening score according to intrinsic ability		Nominal			0 - those who have difficulty hearing whispers and do not use hearing aids		0 to 1
						1 - those who have no difficulty hearing whispers and do not use hearing aids.
DS Score	Score obtained in the sensory domain		Climb			0,1,2		0 to 2
VariationDS	Variation in post-test sensory domain		Climb			-1,0,1,2		-1,0,1,2
Alcoholism	Do you drink alcohol at least once a week?		Nominal			1- Yes		1 and 2
						2- No
Smoking	Do you smoke cigarettes?		Nominal			1- Yes		1 and 2
						2- No
Physical Exercise	Have you exercised in the last 3 months?		Nominal			1- Yes		1 and 2
						2- No
Physical Exercise_times	How many times a week have you exercised in the last 3 months?		Climb			1,2,3,4		1 to 7
Sleep	Do you have insomnia?		Nominal			1- Yes		1 and 2
						2- No
Sleep 1	Do you have a restful sleep?		Nominal			1- Yes		1 and 2
						2- No
Sleep 2	How many hours do you sleep on average per day?		Climb			1,2,3,4		1 to 12
Sun	Do you often expose yourself to the sun?		Nominal			1- Yes		1 and 2
						2- No
Sun_times	How many times a week do you usually expose yourself to the sun?		Climb			0,1,2,3,4		1 to 7
SCALES
EDG1	Are you basically satisfied with your life?		Nominal			0 - Yes		0 and 1
						1- No
EDG2	Have you given up many of your interests and activities?		Nominal			1- Yes		0 and 1
						0- No
EDG3	Do you feel that your life is empty?		Nominal			1- Yes		0 and 1
						0 - No
EDG4	Do you often get bored?		Nominal			1- Yes		0 and 1
						0- No
EDG5	Do you feel in a good mood most of the time?		Nominal			0 - Yes		0 and 1
						1- No
EDG6	Are you afraid that something bad will happen to you?		Nominal			1- Yes		0 and 1
						0- No
EDG7	Do you feel happy most of the time?		Nominal			0- Yes		0 and 1
						1- No
EDG8	Do you feel that there is no way out of your situation?		Nominal			1- Yes		0 and 1
						0 - No
EDG9	Do you prefer to stay at home rather than go out and do new things?		Nominal			1- Yes		0 and 1
						0- No
EDG10	Do you feel like you have more memory problems than most?		Nominal			1- Yes		0 and 1
						0- No
EDG11	Do you think it's wonderful to be alive?		Nominal			0- Yes		0 and 1
						1- No
EDG12	Do you feel useless in the current circumstances?		Nominal			1- Yes		0 and 1
						0- No
EDG13	Do you feel full of energy?		Nominal			0- Yes		0 and 1
						1- No
EDG14	Do you think your situation is hopeless?		Nominal			1- Yes		0 and 1
						0- No
EDG15	Do you feel that most people are better off than you?		Nominal			1- Yes		0 and 1
						0 - No
Score_EDG15	Score obtained on the EDG scale 15		Climb			1,2,3,4		0 to 15
ScoreVariationEDG15	Variation in the EDG15 scale score in the post-test		Climb			0,1,2,3		0 to 2
Classification_EDG15	EDG15 scale rating		Ordinal			1 - Normal (0 to 5)		1 to 3
						2 - Mild depression (6 to 10)
						3- Severe Depression (11 to 15)
DP Score	Score obtained in the psychological domain according to intrinsic capacity		Nominal			0 - values between 11 and 15		0 to 2
						1- values between 6 and 10
						2- values between 0 and 5.
VariationScoreDP	Variation in psychological domain scores in the post-test		Climb			0,1,2,3		-1,0,1,2
IPAQ_total	Total number of minutes in IPAQ		Climb			1,2,3,4		1 to 2000
IPAQ Variation	Post-test IPAQ variation		Climb			0,1,2,3...		1 to 1000
IPAQ_classification	Classification of physical activity level according to IPAQ.		Ordinal			1- Sedentary		1 to 4
						2- Insufficiently active
						3- Active
						4- Very active
SedentaryBehavior_total	Total number of minutes spent in sedentary behavior.		Climb			1,2,3,4		1 to 2000
SedentaryBehavior_classification	Classification of the level of sedentary behavior according to the number of minutes.		Ordinal			1 - Low (< 480 min/day)		1 to 2
						2 - High (> 480 min/day)
SF-6D1	Regarding yourfunctional capacity, Do you think that...?		Nominal			1- Your health does not make it difficult for you to do vigorous activities.		1 to 6
						2. Your health makes it a little difficult for you to do vigorous activities.
						3. Your health makes it a little difficult for you to do moderate activities.
						4. Your health makes it very difficult for you to do moderate activities.
						5. Your health makes it a little difficult for you to bathe or get dressed.
						6. Your health makes it very difficult for you to bathe or get dressed.
SF-6D2	In relation toglobal limitation Do you think that...?		Nominal			1 - You have not had problems with your work or any other regular daily activity as a result of your physical health or any emotional problem.		1 to 4
						2- You have been limited in your type of work or other activities as a result of your physical health.
						3 - You have accomplished fewer tasks than you would like as a result of some emotional problem.
						4 - You have been limited in your type of work or other activities as a result of your physical health and have accomplished fewer tasks than you would like as a result of some emotional problem.
SF-6D3	Regarding social aspects, do you think that...?		Nominal			1- Your physical health or emotional problemsdid not interfere in their social activitiesat no time.		1 to 5
						2-Your physical health or emotional problems interfered in their social activitiesin a small part of the time.
						3- Your physical health or emotional problems interfered in their social activitiesat some point in time
						- Your physical health or emotional problemsinterfered in their social activities most of the time.
						5 - Your physical health or emotional problems interfered with your social activitiesall the time.
SF-6D4	Regarding pain, do you think that...?		Nominal			1 - You didn't have any pain in your body.		1 to 6
						2 - Youhad pain ,but the paindid not interfere in any way in their normal work (including both work outside the home and inside the home).
						3 - You had pain that interfered somewhat with your normal work (including both work outside the home and work inside the home).
						4- Youhad pain that interfered moderately in your normal work (including both work outside the home and inside the home).
						5 - Youthere was pain that interfered a lot in your normal work (including both work outside the home and inside the home).
						- You had pain that greatly interfered with your normal work (including both work outside the home and work inside the home).
SF-6D5	In relation tomental health (Sir/Madam) do you think that...?		Nominal			1- Youhas never felt a very nervous or discouraged and dejected person.		1 to 5
						2 -You has been feeling a very nervous or discouraged and dejected persona small part of the time.
						3 - Have you been feeling very nervous or discouraged and down in the dumps?some of the time.
						4- You have been feeling very nervous or discouraged and dejectedmost of the time.
						5- You have been feeling very nervous or discouraged and dejectedall the time.
SF-6D6	In relation tovitality (Sir/Madam) do you think that...?		Nominal			1- You have been feeling very energeticall the time.		1 to 5
						2 - Have you been feeling very energetic?most of the time.
						3- You have been feeling very energeticat some point in time.
						4 - Have you been feeling very energetic?a small part of the time.
						5 -Younever have been feeling very energetic.
CPF1	Indicate your ability to take care of yourself (e.g. dressing yourself)		Nominal			0 - Can't		1 to 2
						1- Can do it with difficulty or with help
						2- Can you
CPF2	Indicate your ability to take a bath (bathtub or shower)		Nominal			0 - Can't		1 to 2
						1- Can do it with difficulty or with help
						2- Can you
CPF3	Indicate your ability to walk one or two blocks		Nominal			0 - Can't		1 to 2
						1- Can do it with difficulty or with help
						2- Can you
CPF4	Indicate your ability to perform light household tasks (cooking, dusting, washing dishes, sweeping).		Nominal			0 - Can't		1 to 2
						1- Can do it with difficulty or with help
						2- Can you
CPF5	Indicate your ability to climb and descend a flight of stairs		Nominal			0 - Can't		1 to 2
						1- Can do it with difficulty or with help
						2- Can you
CPF6	Indicate your ability to shop (supermarket, clothing)		Nominal			0 - Can't		1 to 2
						1- Can do it with difficulty or with help
						2- Can you
CPF7	Indicate your ability to walk approximately 800 meters (6 to 7 blocks)		Nominal			0 - Can't		1 to 2
						1- Can do it with difficulty or with help
						2- Can you
CPF8	Indicate your ability to walk approximately 1600 meters (12 to 14 blocks)		Nominal			0 - Can't		1 to 2
						1- Can do it with difficulty or with help
						2- Can you
CPF9	Indicate your capacity to hold and carry approximately 5kg (supermarket bag)		Nominal			0 - Can't		1 to 2
						1- Can do it with difficulty or with help
						2- Can you
CPF10	Indicate your capacity to hold and carry approximately 12kg (medium to large suitcase)		Nominal			0 - Can't		1 to 2
						1- Can do it with difficulty or with help
						2- Can you
CPF11	Indicate your ability to perform heavy household tasks (sweeping, vacuuming the floor, mopping the floor, gardening)		Nominal			0 - Can't		1 to 2
						1- Can do it with difficulty or with help
						2- Can you
CPF12	Indicate your ability to perform strenuous activities (taking long walks, carrying heavy objects, digging, cycling, doing gymnastics)		Nominal			0 - Can't		1 to 2
						1- Can do it with difficulty or with help
						2- Can you
CPF Score	Score obtained on the CPF scale		Climb			1,2,3,4		0 to 24
VariationScoreCPF	Variation in CPF scale score in the post-test		Climb			0,1,2,3		0 to 5
ClassificationCPF	Classification obtained on the CPF scale		Ordinal			1 - Low functionality (< 14 points)		1 to 3
						2- Moderate functionality (14 to 23 points)
						3- High functionality (> 24 points)
ScoreMoca	Score obtained in the MoCA test		Climb			0,1,2,3,4		1 to 30
ScoreVariationMoca	Variation in the Moca scale in the post-test		Climb			0,1,2,3,4		1 to 5
MoCA Classification	Classification obtained in the MoCA test according to schooling (CC < 20 points for 4 to 12 years and < 21 points for + 12 years)		Nominal			1- No cognitive impairment		1 to 2
						2- With cognitive impairment
DCScore	Moca scoring according to intrinsic ability		Climb			0- cognitive impairment		0 to 2
						2- no cognitive impairment
VariationScoreDC	Variation in DC in post-test		Climb			0,1,2,3		0 to 5
PHYSICAL EVALUATION
Weight	Weight (kg)		Climb			1,2,3,4		1 to 100
Weight Variation	Weight variation in post-test		Climb			1,2,3,4
Height	Height (cm)		Climb			1,2,3,4		1 to 200
Current fat	Current Body Fat Percentage (%)		Climb			1,2,3,4...		1 to 50
CurrentFatVariation	Variation in current fat value in post-test		Climb			1,2,3,4...		1 to 10
Class_Current Fat	Current Body Fat Percentage Ranking (%)		Ordinal			1- Low (< 24 M; < 13 H)		1 to 4
						2- Normal (24.0 -35.9 M; 13.0 - 24.9 H)
						3- High (36.0 - 41.9 M; 25.0 - 29.9 H)
						4- Very high (≥ 42.0 M; ≥ 30 H)
Muscle mass	Muscle mass percentage (%)		Climb			1,2,3,4...		1 to 50
MuscleMassVariation	Variation in muscle mass in the post-test		Climb			1,2,3,4		1 to 5
visceral fat	Value of visceral fat		Climb			1,2,3,4		1 to 15
VariationVisceral_fat	Variation in visceral fat in the post-test		Climb			1,2,3,4		1 to 5
Class_Visceral fat	Visceral Fat Classification		Ordinal			1- Normal (≤ 9)		1 to 3
						2- High (≥ 10 and ≤ 14)
						3- Very High (≥ 15)
Basal metabolic value	Basal metabolic value in k/cal		Climb			1,2,3,4		1 to 3000
Body age	Body age in years		Climb			1,2,3,4		1 to 100
BMI	BMI (weight/height2)		Climb			1,2,3,4		1 to 40
IMC Score	BMI score according to intrinsic capacity		Nominal			1- values between 22- 27 Kg/m2
						0.5- values below 22 kg/m2 and above 27 kg/m2
BMI Variation	Post-test BMI variation		Climb			0,1,2,3		1 to 5
Nutritional Status	Classification of the nutritional status of the elderly		Ordinal			1 - Low weight (less than 22 kg/m2)		1 to 3
						2- Adequate weight (above 22 and less than or equal to 27 kg/m2)
						3- Overweight (over 27 kg/m2)
Grip strength D	Right hand grip strength in kgf		Climb			1,2,3,4		1 to 50
FPD Score	FPD score according to intrinsic ability		Nominal			0- strength values lower than < 27 kgf for men and < 16 kgf for women
						0.5 - values equal to or greater than ≥ 27 kgf for men and ≥16 kgf for women
FPD Classification	Do you have low muscle strength?		Nominal			1- Yes (< 16 kg M; < 27 kg H)		1 to 2
						2- No
weight_loss	Have you had an unintentional weight loss of 3 kg or more in the last three months?		Nominal			1- Yes 2- No		1 to 2
weight_loss1	How many kilograms were lost?		Climb			0,1,2,3,4		0 to 100
WeightLossScore	Weight loss score according to intrinsic capacity		Nominal			0- for weight loss of 3kg or more in the last three months
						0.5- for losses of less than 3kg or no weight loss
Loss_of_appetite	Have you been experiencing loss of appetite?		Nominal			1- Yes 2-No		1 to 2
ScoreLossofappetite	Appetite loss score according to intrinsic capacity		Nominal			0 - for “yes” answers
						0.5 for the answer “no”
DV Score	Score obtained in the vitality domain		Climb			0,1,2,3,4		1 to 4
Sit and Stand	Number of repetitions in 30 seconds		Climb			1,2,3,4		1 to 30
VariationSittingandStanding	Variation in the sit-to-stand test at post-test		Climb			0,1,2,3		1 to 5
Class_sit and stand	Sit-to-stand test classification		Ordinal		Woman	1- Normal 2- Risk	(60- 64): 15	1 to 2
							(65 to 69): 15
							(70 to 74): 14
							(75 to 79): 13
							(80 to 84): 12
							(85 to 89): 11
							(90 to 94): 9
					Man	1- Normal 2- Risk	(60 to 64): 17
							(65 to 69): 16
							(70 to 74): 15
							(75 to 79): 14
							(80 to 84): 13
							(85 to 89): 11
							(90 to 94): 9
ScoreSittingandStanding	Sit-to-stand test scoring according to intrinsic capacity		Nominal			1- cut-off point reached for sex and age
						0-cutoff point not reached for sex and age
TUG	Time to perform TUG in seconds		Climb			1,2,3,4		1 to 30
TUG Variation	Variation in TUG in post-test		Climb			1,2,3,4		1 to 5
Class_TUG	TUG classification according to time in seconds		Ordinal			1 - Normal (< 10 seconds)		1 to 3
						2- Moderate risk of falls (≥10 and <19 seconds)
						3- High risk of falls (> 20 seconds)
TUgScore	TUG test score according to intrinsic capacity		Nominal			1- time less than 10 seconds
						0- time greater than 10 seconds
Flexibility	Value in the Chair Sit & Reach test in centimeters		Climb			1,2,3,4		1 to 20
ScoreFlexibility	Flexibility test score according to intrinsic capacity		Nominal			0.0 - for low flexibility
						0.5 for normal flexibility
VariationFlexibility	Variation in flexibility testing in the post-test		Climb			-1,0,1,2,3		1 to 2
Class_Flexibility	Flexibility test classification		Ordinal		Woman	1- Normal flexibility	(60-64): -0.5 to +5.0
							(65-69): -0.5 to +4.5
							(70-74): -1.0 to +4.0
						2- Low flexibility	(75 to 79): -1.5 to +3.5
							(80 to 84): -2.0 to +3.0
							(85 to 89): -2.5 to +2.5
							(90 to 94): -4.5 to +1.0
					Man	1- Normal flexibility	(60 to 64): -2.5 to +4.0
							(65 to 69): -3.0 to +3.0
							(70 to 74): -3.5 to +2.5
							(75 to 79): -4.9 to +2.0
						2- Low flexibility	(80 to 84): -5.5 to +1.5
							(85 to 89): -5.5 to +0.5
							(90 to 94): -6.5 to -0.5
Balance	Bohannon test value in seconds		Climb			1,2,3,4		1 to 20
ScoreBalance	Balance test score according to intrinsic capacity		Nominal			0.0 - for < 20 seconds
						0.5 - for > 21 seconds
VariationBalance	Variation in balance test in post-test		Climb			1,2,3,4		1 to 4
Class_Bohannon	Classification in the Bohannon test according to time in seconds		Ordinal			1- Risk (< 20 seconds men and women)		1 to 3
						2- Normal (> 21 seconds men and women)
						3- Excellent (31 seconds men and women)
DL Score	Score obtained in the locomotor domain		Climb			0,1,2		1 to 2
Pwaist	Waist circumference in centimeters		Climb			1,2,3,4		1 to 200
VariationWaist	Variation in waist circumference in the post-test		Climb			0,1,2,3,4		1 to 5
Abdominal	Abdominal perimeter in centimeters		Climb			1,2,3,4		1 to 200
Abdominal Variation	Variation in abdominal perimeter in the post-test		Climb			0,1,2,3		1 to 5
Class_Pabdominal	Abdominal perimeter classification		Ordinal			1- Normal (< 79cm M; < 83cm H)		1 to 3
						2 - High (> 80 cm M; > 84 cm H)
						3 - Very High (≥ 88 cm M; ≥ 102 cm H)
PcoxaD	Thigh circumference D in centimeters		Climb			1,2,3,4		1 to 100
VariationPcoxaD	Variation in the perimeter of the thigh D in the post-test		Climb			0,1,2,3		1 to 5
PcoxaE	Thigh circumference E in centimeters		Climb			1,2,3,4		1 to 100
VariationPcoxaE	Variation in left thigh perimeter in the post-test		Climb			1,2,3,4,5		1 to 5
PcalfD	Calf circumference D in centimeters		Climb			1,2,3,4		1 to 100
Calf VariationD	Variation in the perimeter of the right calf in the post-test		Climb			0,1,2,3,4
Calf	Calf circumference E in centimeters		Climb			1,2,3,4		1 to 100
Calf Variation And	Variation in calf perimeter E in the post-test		Climb			0,1,2,3,4		1 to 5
Class_Calf	Classification of Calf Circumference in Centimeters		Ordinal			1- Normal (> 31 cm H and M)		1 and 2
						2- Decreased (< 31 cm H and M)
PAS	Systolic Blood Pressure Value in Millimeters of Mercury (mmHg)		Climb			1,2,3,4		1 to 200
PAD	Diastolic Blood Pressure Value in Millimeters of Mercury (mmHg)		Climb			1,2,3,4		1 to 200
Class_PA	Blood Pressure Classification		Ordinal			1 - Optimal BP (SBP < 120 and DBP < 80)		1 to 6
						- Normal BP (SBP: 120-129 and/or DBP: 80-84)
						3- Pre-Hypertension (SBP: 130-139 and/or DBP: 85-89)
						4- HA stage I (SBP: 140-159 and/or DBP: 90-99)
						5- HA stage II (SBP: 160-179 and/or DBP: 100-109)
						6- HA stage III (SBP: ≥ 180 and DBP: ≥ 110)
Heart Rate	Heart rate measurement value in beats per minute		Climb			1,2,3,4		1 to 200
Heart_Rate_Variation	Heart rate variation in post-test		Climb			-1,0,1,2		1 to 30
CIC Score	Composite intrinsic ability score		Climb			0,1,2,3		1 to 10
CIC Variation	Variation in composite intrinsic capacity in the post-test		Climb			0,1,2,3		1 to 10
FrequencyP	Number of times you attend the PIAFI program per week		Ordinal			1- 1x per week		1 to 5
						2- 2x per week
						3- 3x per week
						4- 4x per week
						5- 5x per week
TimeP	Time spent in PIAFI performing activities (in minutes)		Climb			1,2,3,4		1 to 400
Bodybuilding and Cardio	Have you practiced weight training and cardio in the last 3 months?		Nominal			1- Yes		1 to 2
						2- No
Chinese Healing Gymnastics	Have you practiced Chinese healing gymnastics in the last 3 months?		Nominal			1- Yes		1 to 2
						2- No
Pilates	Have you practiced Pilates in the last 3 months?		Nominal			1- Yes		1 to 2
						2- No
Circular dances	Have you practiced Circular Dances in the last 3 months?		Nominal			1- Yes		1 to 2
						2- No
Gerontomotricity	Have you practiced gerontomotricity in the last 3 months?		Nominal			1- Yes		1 to 2
						2- No
Maintenance gymnastics	Have you practiced any type of maintenance gymnastics in the last 3 months?		Nominal			1- Yes		1 to 2
						2- No
Pedestrianism	Have you practiced hiking in the last 3 months?		Nominal			1- Yes		1 to 2
						2- No
Nordic walking	Have you practiced Nordic walking in the last 3 months?		Nominal			1- Yes		1 to 2
						2- No
Water aerobics/Water activity	Have you practiced water aerobics/aquatic activities in the last 3 months?		Nominal			1- Yes		1 to 2
						2- No
Exchange	Have you used the exchange method in the last 3 months?		Nominal			1- Yes		1 to 2
						2-No
N_modalities	How many sports do you practice at PIAFI?		Climb			1,2,3,4,5		1 to 10

## Sheet:  Spreadsheet2
Time	Code	Age	Sex	Education	Marital_Status	Current_occupation	Source_of_income	Children	Family_Arrangement	Support_network	Social_Participation	Leisure	At_Reasoning	At_Lúdicas	Health_perception	Illness	Disease1	Disease2	Disease3	Disease4	Disease5	Disease6	Disease7	Disease8	Disease9	Disease10	Disease11	Disease12	Disease13	Disease14	Disease15	Disease16	Disease17	Medications	Polypharmacy	Medications1	Medications2	Medications3	Medications4	Medications5	Medications6	Medications7	Medications8	Medications9	Medications10	Medications11	Medications12	Medications13	Medications14
1	212	60	1	7	1	1	2	2	2	1	1	1	1	1	3	1	2	2	2	2	2	2	2	2	2	2	2	2	2	2	2	1	1	1	2	2	2	1	2	2	2	2	2	2	2	2	1	2	2
2	212	60	1	7	1	1	2	2	2	1	1	1	1	1	3	1	2	2	2	2	2	2	2	2	2	2	2	2	2	2	2	1	1	1	5	2	1	1	2	2	1	2	2	2	2	2	1	2	1
1	221	71	1	8	1	4	4	1	4	1	2	1	1	1	4	1	1	2	2	2	2	2	2	2	1	2	2	2	2	1	2	1	2	1	6	2	2	1	2	2	1	2	2	1	1	2	1	2	1
2	221	71	1	8	1	4	4	1	4	1	2	1	1	1	4	1	1	2	2	2	2	2	2	2	1	2	2	2	2	1	2	1	2	1	6	2	2	1	2	2	1	2	2	1	1	2	1	2	1
1	222	69	2	6	1	4	4	1	2	1	2	1	1	1	4	1	2	2	2	2	2	2	2	2	2	2	1	2	2	2	2	1	2	1	7	1	2	2	2	2	2	2	2	1	1	2	1	2	1
2	222	69	2	6	1	4	4	1	2	1	2	1	1	1	4	1	2	2	2	2	2	2	2	2	2	2	1	2	2	2	2	1	2	1	6	1	2	2	2	2	2	2	2	1	2	2	1	2	1
1	225	66	1	7	3	4	4	2	1	2	2	1	1	1	3	1	1	2	2	2	2	2	2	2	1	2	2	2	2	2	2	2	1	1	3	2	2	1	2	2	1	2	2	2	2	2	2	2	2
1	240	64	1	4	4	4	4	0	1	1	2	1	1	1	4	1	2	2	2	2	2	2	2	2	2	2	2	2	2	2	2	1	1	1	4	1	2	2	2	2	2	2	2	2	2	2	1	2	1
2	240	64	1	4	4	4	4	0	1	1	2	1	1	1	5	1	2	2	2	2	2	2	2	2	2	2	2	2	2	2	2	1	1	1	3	1	2	2	2	2	2	2	2	2	2	2	1	2	1
1	241	68	1	4	2	4	4	2	1	1	2	1	1	2	4	1	2	2	2	2	2	2	2	2	2	2	1	2	2	2	2	2	1	1	3	1	2	1	2	2	2	2	2	2	2	2	2	2	2
2	241	68	1	4	2	4	4	2	1	1	2	1	1	2	5	1	2	2	2	2	2	2	2	2	2	2	1	2	2	2	2	2	1	1	3	1	2	1	2	2	2	2	2	2	2	2	2	2	2
1	243	61	1	7	4	4	4	1	3	1	1	1	1	1	4	1	2	2	2	2	2	2	2	2	1	2	1	2	2	2	1	2	2	1	3	1	2	2	2	2	1	2	2	2	2	2	1	2	2
2	243	61	1	7	4	4	4	1	3	1	1	1	1	1	4	1	2	2	2	2	2	2	2	2	1	2	1	2	2	2	1	2	2	1	3	1	2	2	2	2	1	2	2	2	2	2	1	2	2
1	244	73	1	6	2	4	4	1	1	1	2	1	1	1	5	1	2	2	2	2	2	2	2	2	1	2	2	2	2	2	2	2	1	1	1	2	2	2	2	2	2	2	2	2	2	2	1	2	2
2	244	73	1	6	2	4	4	1	1	1	2	1	1	1	3	1	2	2	2	2	2	2	2	2	1	2	2	2	2	2	2	2	1	1	1	2	2	2	2	2	2	2	2	2	2	2	1	2	2
1	245	68	1	7	4	4	4	1	1	1	2	1	1	1	4	1	2	2	2	2	2	2	2	2	2	2	1	2	1	2	2	2	2	1	3	1	1	2	2	2	2	2	2	1	2	2	2	2	2
2	245	68	1	7	4	4	4	1	1	1	2	1	1	1	3	1	2	2	2	2	2	2	2	2	2	2	1	2	1	2	2	2	2	1	3	1	1	2	2	2	2	2	2	1	2	2	2	2	2
1	254	69	2	2	1	4	4	5	2	2	2	2	2	1	4	1	2	2	2	2	2	2	2	2	2	2	2	2	2	2	2	2	1	1	2	2	2	2	2	2	2	2	2	2	2	2	2	2	1
2	254	69	2	2	1	4	4	5	2	2	2	2	2	1	4	1	2	2	2	2	2	2	2	2	2	2	2	2	2	2	2	2	1	1	2	2	2	2	2	2	2	2	2	2	2	2	2	2	1
1	257	66	1	4	1	4	4	5	2	1	1	1	1	1	3	1	2	2	2	2	2	2	2	2	1	1	1	2	1	2	2	2	1	1	7	1	1	2	1	1	1	1	2	2	2	2	2	2	2
2	257	66	1	4	1	4	4	5	2	1	1	1	1	1	4	1	2	2	2	2	2	2	2	2	1	1	1	2	1	2	2	2	1	1	7	1	1	2	1	1	1	1	2	2	2	2	2	2	2
1	261	63	1	5	2	2	2	5	1	1	1	1	1	1	4	1	2	2	2	2	2	2	2	2	2	2	1	2	1	2	2	2	2	1	2	1	1	2	2	2	2	2	2	2	2	2	2	2	2
2	261	63	1	5	2	2	2	5	1	1	1	1	1	1	4	1	2	2	2	2	2	2	2	2	2	2	1	2	1	2	2	2	2	1	2	1	1	2	2	2	2	2	2	2	2	2	2	2	2
1	262	69	1	8	3	4	4	2	1	1	2	1	1	1	2	1	2	2	2	2	2	2	2	2	2	2	1	2	2	1	2	2	1	1	10	1	2	2	1	2	2	2	1	1	1	2	2	1	1
2	262	69	1	8	3	4	4	2	1	1	2	1	1	1	3	1	2	2	2	2	2	2	2	2	2	2	1	2	2	1	2	2	1	1	10	1	2	2	1	2	2	2	1	1	1	2	2	1	1
1	263	70	1	2	1	4	4	2	2	1	2	1	1	1	3	1	2	2	2	2	2	2	2	2	1	1	1	2	1	2	2	2	2	1	6	1	1	2	2	2	1	2	2	2	2	2	1	1	2
2	263	70	1	2	1	4	4	2	2	1	2	1	1	1	3	1	2	2	2	2	2	2	2	2	1	1	1	2	1	2	2	2	2	1	5	1	1	2	2	2	1	2	2	2	2	2	1	1	2
1	264	66	1	4	2	4	4	1	1	1	2	1	1	1	4	1	1	2	2	2	2	2	2	2	1	2	2	2	2	1	2	1	2	1	3	2	2	1	2	2	1	2	2	2	2	2	1	2	2
2	264	66	1	4	2	4	4	1	1	1	2	1	1	1	4	1	1	2	2	2	2	2	2	2	1	2	2	2	2	1	2	1	2	1	3	2	2	1	2	2	1	2	2	2	2	2	1	2	2
1	269	66	1	7	1	4	4	1	2	1	2	1	1	1	4	1	2	2	2	2	2	2	2	2	2	2	2	2	2	1	2	2	2	1	3	2	2	2	2	2	2	2	1	1	1	2	2	2	2
2	269	66	1	7	1	4	4	1	2	1	2	1	1	1	5	1	2	2	2	2	2	2	2	2	2	2	2	2	2	1	2	2	2	1	3	2	2	2	2	2	2	2	1	1	1	2	2	2	2
1	270	69	1	7	3	4	4	3	3	1	1	1	1	1	4	1	2	2	2	2	2	2	2	2	1	2	1	2	2	2	2	2	1	1	9	1	2	2	2	2	1	2	1	1	2	2	2	2	1
2	270	69	1	7	3	4	4	3	3	1	1	1	1	1	5	1	2	2	2	2	2	2	2	2	1	2	1	2	2	2	2	2	1	1	9	1	2	2	2	2	1	2	1	1	2	2	2	2	1
1	272	74	1	5	2	4	4	4	1	1	2	1	1	1	4	1	2	2	2	2	2	2	2	2	1	2	2	2	2	2	2	1	1	1	3	2	2	2	2	1	1	2	2	2	2	2	1	2	2
2	272	74	1	5	2	4	4	4	1	1	2	1	1	1	5	1	2	2	2	2	2	2	2	2	1	2	2	2	2	2	2	1	1	1	2	2	2	2	2	2	1	2	2	2	2	2	1	2	2
1	274	61	1	3	1	4	4	1	2	1	2	1	1	1	4	1	2	2	2	2	2	2	2	2	1	2	2	2	2	2	2	2	1	1	3	2	2	2	2	2	1	2	1	2	1	2	2	2	2
2	274	61	1	3	1	4	4	1	2	1	2	1	1	1	5	1	2	2	2	2	2	2	2	2	1	2	2	2	2	2	2	2	1	1	3	2	2	2	2	2	1	2	1	2	1	2	2	2	2
1	275	74	1	2	1	6	5	2	2	1	2	1	1	1	4	1	2	2	2	2	2	2	2	2	2	2	2	2	2	2	2	2	1	1	1	2	2	2	2	2	2	2	2	2	2	2	2	2	1
2	275	74	1	2	1	6	5	2	2	1	2	1	1	1	4	1	2	2	2	2	2	2	2	2	2	2	2	2	2	2	2	2	1	1	2	1	2	2	2	2	2	2	2	2	2	2	2	2	1
1	278	64	1	3	1	4	4	1	4	1	2	1	1	1	4	1	2	2	2	2	2	2	2	2	2	2	2	2	2	1	2	2	2	2	0	2	2	2	2	2	2	2	2	2	2	2	2	2	2
2	278	64	1	3	1	4	4	1	4	1	2	1	1	1	5	1	2	2	2	2	2	2	2	2	2	2	2	2	2	1	2	2	2	2	0	2	2	2	2	2	2	2	2	2	2	2	2	2	2
1	285	64	1	5	1	4	4	2	2	1	2	1	1	1	4	2	2	2	2	2	2	2	2	2	2	2	2	2	2	2	2	2	2	2	0	2	2	2	2	2	2	2	2	2	2	2	2	2	2
2	285	64	1	5	1	4	4	2	2	1	2	1	1	1	5	2	2	2	2	2	2	2	2	2	2	2	2	2	2	2	2	2	2	2	0	2	2	2	2	2	2	2	2	2	2	2	2	2	2
1	287	65	1	7	3	4	4	1	1	1	2	1	1	1	5	1	2	2	2	2	2	2	2	2	1	2	2	2	2	2	2	1	1	1	5	2	2	2	2	2	1	2	1	2	2	2	1	2	1
2	287	65	1	7	3	4	4	1	1	1	2	1	1	1	5	1	2	2	2	2	2	2	2	2	1	2	2	2	2	2	2	1	1	1	5	2	2	2	2	2	1	2	1	2	2	2	1	2	1
1	288	70	1	2	2	4	1	2	1	1	2	1	1	1	5	1	2	2	2	2	2	2	2	2	1	2	1	2	2	2	2	2	2	1	4	1	2	2	2	2	2	2	1	1	2	2	2	2	1
2	288	70	1	2	2	4	1	2	1	1	2	1	1	1	5	1	2	2	2	2	2	2	2	2	1	2	1	2	2	2	2	2	2	1	4	1	2	2	2	2	2	2	1	1	2	2	2	2	1
1	289	67	1	4	2	4	4	3	3	1	2	2	1	1	4	1	2	2	2	2	2	2	2	2	1	2	1	2	1	2	2	2	1	1	6	1	1	2	2	2	1	2	2	1	2	2	2	2	2
2	289	67	1	4	2	4	4	3	3	1	2	2	1	1	5	1	2	2	2	2	2	2	2	2	1	2	1	2	1	2	2	2	1	1	5	1	1	2	2	2	1	2	2	2	2	2	2	2	2
1	291	70	1	6	4	4	4	1	3	1	2	1	1	1	4	1	2	2	2	2	2	2	2	2	2	2	1	2	2	2	2	2	2	1	2	1	2	2	2	2	2	2	2	2	2	2	2	2	2
2	291	70	1	6	4	4	4	1	3	1	2	1	1	1	4	1	2	2	2	2	2	2	2	2	2	2	1	2	2	2	2	2	2	1	3	1	2	2	2	2	2	2	2	2	2	2	2	2	2
1	293	77	1	5	2	4	4	2	1	2	1	1	1	1	4	1	2	2	2	2	2	2	2	2	2	2	2	2	2	1	2	2	2	1	3	2	2	2	2	2	2	2	2	1	2	2	2	2	1
2	293	77	1	5	2	4	4	2	1	2	1	1	1	1	4	1	2	2	2	2	2	2	2	2	2	2	2	2	2	1	2	2	2	1	3	2	2	2	2	2	2	2	2	1	2	2	2	2	1
1	297	66	1	7	4	4	4	2	5	1	2	1	1	1	4	1	2	2	2	2	2	2	2	2	2	2	1	2	2	2	2	2	2	1	4	1	2	2	2	1	2	2	2	2	2	2	2	2	2
2	297	66	1	7	4	4	4	2	5	1	2	1	1	1	4	1	2	2	2	2	2	2	2	2	2	2	1	2	2	2	2	2	2	1	4	1	2	2	2	1	2	2	2	2	2	2	2	2	2
1	302	68	1	5	2	4	4	1	1	1	2	1	1	1	4	1	2	2	2	2	2	2	2	2	1	2	2	2	2	2	2	1	2	1	2	2	2	2	2	2	1	2	2	2	2	2	1	2	2
1	304	66	2	2	3	4	4	2	2	1	1	1	1	1	4	2	2	2	2	2	2	2	2	2	2	2	2	2	2	2	2	2	2	2	0	2	2	2	2	2	2	2	2	2	2	2	2	2	2
2	304	66	2	2	3	4	4	2	2	1	1	1	1	1	4	2	2	2	2	2	2	2	2	2	2	2	2	2	2	2	2	2	2	2	0	2	2	2	2	2	2	2	2	2	2	2	2	2	2
1	307	70	1	5	3	5	1	4	1	1	2	1	1	1	4	1	1	2	2	2	2	2	2	2	1	2	1	2	1	2	2	2	2	1	7	1	1	1	2	2	1	2	2	2	2	2	2	2	2
2	307	70	1	5	3	5	1	4	1	1	2	1	1	1	4	1	1	2	2	2	2	2	2	2	1	2	1	2	1	2	2	2	2	1	7	1	1	1	2	2	1	2	2	2	2	2	2	2	2
1	308	70	2	8	1	4	4	1	2	1	1	1	1	1	5	2	2	2	2	2	2	2	2	2	2	2	2	2	2	2	2	2	2	2	0	2	2	2	2	2	2	2	2	2	2	2	2	2	2
2	308	70	2	8	1	4	4	1	2	1	1	1	1	1	5	2	2	2	2	2	2	2	2	2	2	2	2	2	2	2	2	2	2	2	0	2	2	2	2	2	2	2	2	2	2	2	2	2	2
1	311	71	1	4	1	4	4	1	2	1	2	1	1	1	2	1	2	2	2	2	2	2	2	2	1	2	2	2	1	2	2	2	1	1	2	2	1	2	2	2	2	2	2	2	2	2	2	2	2
2	311	71	1	4	1	4	4	1	2	1	2	1	1	1	3	1	2	2	2	2	2	2	2	2	1	2	2	2	1	2	2	2	1	1	2	2	1	2	2	2	2	2	2	2	2	2	2	2	2
1	312	66	1	2	2	4	4	3	1	1	2	1	1	1	2	1	1	1	2	2	2	2	2	2	2	2	1	2	1	2	2	2	2	1	1	2	1	2	2	2	2	2	2	2	2	2	2	2	2
1	314	63	1	5	1	4	4	4	2	1	2	1	1	2	3	1	1	2	2	2	2	2	2	2	2	2	1	2	1	1	2	2	2	1	6	1	1	2	2	2	2	2	1	1	1	2	2	2	2
2	314	63	1	5	1	4	4	4	2	1	2	1	1	2	4	1	1	2	2	2	2	2	2	2	2	2	1	2	1	1	2	2	2	1	4	1	1	2	2	2	2	2	2	2	1	2	2	2	2
1	318	63	1	5	3	4	4	1	3	1	2	1	1	1	4	1	2	2	2	2	2	2	2	2	2	2	1	2	2	2	2	2	1	1	2	1	2	2	2	2	2	2	2	2	2	2	2	2	2
2	318	63	1	5	3	4	4	1	3	1	2	1	1	1	5	1	2	2	2	2	2	2	2	2	2	2	1	2	2	2	2	2	1	1	2	1	2	2	2	2	2	2	2	2	2	2	2	2	2
1	319	72	2	7	1	4	4	1	2	1	2	1	1	1	4	1	2	2	2	2	2	2	2	2	1	2	1	2	1	2	2	2	2	1	6	1	1	2	2	2	1	2	2	2	2	2	2	2	1
2	319	72	2	7	1	4	4	1	2	1	2	1	1	1	4	1	2	2	2	2	2	2	2	2	1	2	1	2	1	2	2	2	2	1	6	1	1	2	2	2	1	2	2	2	2	2	2	2	1
1	320	68	1	5	1	5	1	3	3	1	2	1	1	1	4	1	2	2	2	2	2	2	2	2	2	2	1	2	2	2	2	2	2	1	1	1	2	2	2	2	2	2	2	2	2	2	2	2	2
2	320	68	1	5	1	5	1	3	3	1	2	1	1	1	5	1	2	2	2	2	2	2	2	2	2	2	1	2	2	2	2	2	2	1	1	1	2	2	2	2	2	2	2	2	2	2	2	2	2
1	322	72	2	5	1	4	4	2	4	1	2	1	1	1	4	2	2	2	2	2	2	2	2	2	2	2	2	2	2	2	2	2	2	2	0	2	2	2	2	2	2	2	2	2	2	2	2	2	2
2	322	72	2	5	1	4	4	2	4	1	2	1	1	1	4	2	2	2	2	2	2	2	2	2	2	2	2	2	2	2	2	2	2	2	0	2	2	2	2	2	2	2	2	2	2	2	2	2	2
1	323	66	1	8	1	4	4	1	2	1	1	1	1	1	3	1	2	1	2	2	2	2	2	2	1	2	1	2	1	2	2	1	1	1	9	1	1	1	2	1	1	2	2	2	2	2	1	2	2
2	323	66	1	8	1	4	4	1	2	1	1	1	1	1	4	1	2	1	2	2	2	2	2	2	1	2	1	2	1	2	2	1	1	1	9	1	1	1	2	1	1	2	2	2	2	2	1	2	2
1	324	61	1	7	1	3	3	2	2	1	2	1	1	1	3	1	2	2	2	2	2	2	2	2	2	2	2	2	2	1	2	2	1	1	4	2	2	1	2	2	2	2	2	2	1	2	2	2	2
2	324	61	1	7	1	3	3	2	2	1	2	1	1	1	4	1	2	2	2	2	2	2	2	2	2	2	2	2	2	1	2	2	1	1	6	2	2	1	2	1	2	2	2	2	1	2	2	2	2
1	333	80	1	4	3	4	4	4	1	1	2	1	1	1	3	1	2	2	2	2	2	2	2	2	1	2	1	2	2	2	2	2	1	1	7	1	2	2	2	2	1	2	1	2	1	2	2	2	2
2	333	80	1	4	3	4	4	4	1	1	2	1	1	1	4	1	2	2	2	2	2	2	2	2	1	2	1	2	2	2	2	2	1	1	8	1	2	2	2	2	1	2	1	2	1	2	2	2	2
1	342	65	1	3	3	4	4	2	1	1	2	1	1	1	4	1	2	2	2	2	2	2	2	2	1	2	2	2	2	2	2	2	1	1	1	2	2	2	2	2	1	2	2	2	2	2	2	2	2
2	342	65	1	3	3	4	4	2	1	1	2	1	1	1	4	1	2	2	2	2	2	2	2	2	1	2	2	2	2	2	2	2	1	1	3	1	2	2	2	2	1	2	2	2	2	2	2	2	2
[truncated: 151 more columns]
